# Supplementary material
Source: PubMed Central journal article supplement (PMC3339381)
Supplement: Supp_Data.pdf [file Supp_Data.pdf]

## Supplementary Data

SUPPLEMENTARY TABLE 1. MAJOR ELECTROCARDIOGRAPHIC ABNORMALITIES BY MINNESOTA CODE CLASSIFICATION

| <i>Category of abnormality</i>                    | <i>Description of abnormality</i>                                            | <i>Code</i>                                          |                                        |
|---------------------------------------------------|------------------------------------------------------------------------------|------------------------------------------------------|----------------------------------------|
| Ventricular conduction defects                    | Ventricular conduction defect                                                | mc_7                                                 | 7.1                                    |
|                                                   | Complete/intermittent left bundle branch block                               |                                                      | 7.2<br>7.4                             |
|                                                   | Complete/intermittent right bundle branch block                              |                                                      | 7.8                                    |
|                                                   | Nonspecific intraventricular block                                           |                                                      |                                        |
|                                                   | Complete/intermittent right bundle branch block with/left anterior hemiblock |                                                      |                                        |
| Myocardial infarction/ischemia                    | Major Q wave abnormalities [possible old myocardial infarction (MI)]         | mc_1 (I,v,f)                                         | 1.1.x,<br>1.2.x                        |
| Myocardial infarction/ischemia                    | Minor Q,QS waves with ST,T abnormalities (possible old MI)                   | mc_1,<br>mc_4,<br>mc5 (I,f,v)                        | 1.3.x and<br>(4.1.x, 4.2,<br>5.1, 5.2) |
| Myocardial infarction/ischemia                    | Major isolated ST_T abnormalities                                            | mc_4,<br>mc_5 (I,f,v)                                | 4.1.x, 4.2,<br>5.1, 5.2                |
| Voltage criteria for left ventricular hypertrophy | Left ventricular hypertrophy                                                 | mc_3;<br>mc_4,<br>mc_5 (I,f,v)                       | 3.1 and<br>(4.1.x, 4.2,<br>5.1, 5.2)   |
| Arrhythmias                                       | Atrial fibrillation or flutter                                               | mcr_83                                               | 8.3.1                                  |
| Atrioventricular conduction defects               | Major atrioventricular conduction abnormalities                              | mcr_62                                               | 6.2.x                                  |
|                                                   |                                                                              | mcr_61                                               | 6.1.1                                  |
|                                                   |                                                                              | mcr_86                                               | 8.6.1, 8.6.2                           |
|                                                   |                                                                              | mcr_64                                               | 6.4.1                                  |
| Repolarization abnormalities                      | Major QT prolongation, QTl > = 116, codes not suppressed                     | qti, jti (use Qti if QRS ≤ 116 and jti if QRS > 120) |                                        |
| Electronic pacing                                 | Pacemaker                                                                    | mcr_68                                               | 6.8.1                                  |
| Arrhythmias                                       | Other major arrhythmias                                                      | mcr_82                                               | 8.2.x                                  |
| Arrhythmias                                       | Intermittent atrial flutter or fibrillation                                  | mcr_83                                               | 8.3.2,8.3.3                            |
| Arrhythmias                                       | Supraventricular tachycardia                                                 | mcr_84                                               | 8.4.2                                  |

SUPPLEMENTARY TABLE 2. MINOR ELECTROCARDIOGRAPHIC ABNORMALITIES BY MINNESOTA CODE CLASSIFICATION

| <i>Category of abnormality</i>                    | <i>Description of abnormality</i>                                                       | <i>Code</i>                                          |                        |
|---------------------------------------------------|-----------------------------------------------------------------------------------------|------------------------------------------------------|------------------------|
| Myocardial infarction/ischemia                    | Minor isolated Q, QS waves                                                              | mc_1 (I,f,v)                                         | 1.3.x                  |
| Myocardial infarction/ischemia                    | Minor isolated ST, T abnormalities                                                      | mc_4,<br>mc_5 (I,f,v)                                | 4.3, 4.4,<br>5.3, 5.4  |
| Voltage criteria for left ventricular hypertrophy | High R waves                                                                            | mc_3                                                 | 3.1, 3.2,<br>3.3, 3.4  |
| Repolarization abnormalities                      | ST segment elevation, anterolateral site                                                | mc_I92                                               | 9.2.1                  |
| Repolarization abnormalities                      | ST segment elevation, posterior site                                                    | mc_f92                                               | 9.2.1                  |
| Repolarization abnormalities                      | ST segment elevation, anterior site                                                     | mc_v92                                               | 9.2.1                  |
| Ventricular conduction defects                    | Incomplete bundle branch block                                                          |                                                      |                        |
|                                                   | Incomplete right bundle branch block                                                    | mc_7                                                 | 7.3                    |
|                                                   | Incomplete left bundle branch block                                                     | mc_7                                                 | 7.6, 7.7               |
| Repolarization abnormalities                      | Minor QT prolongation, QT <sub>i</sub> > = 112% but less than 116; codes not suppressed | qti, jti (use Qti if QRS < 116 and jti if QRS > 120) |                        |
| AV conduction defects                             | Short PR                                                                                | mcr_65                                               | 6.5.1                  |
| QRS axis deviation                                | Left axis deviation                                                                     | mc_2                                                 | 2.1                    |
| QRS axis deviation                                | Right axis deviation                                                                    | mc_2                                                 | 2.2                    |
| Arrhythmias                                       | Frequent ventricular premature beats                                                    | mcr_81                                               | 8.1.2, 8.1.3,          |
|                                                   | Other minor abnormalities                                                               |                                                      |                        |
| AV conduction defects                             | First degree AV block                                                                   | mcr_63                                               | 6.3.1                  |
| Arrhythmias                                       | Atrial ectopics, wandering pacemaker or both                                            | mcr_81                                               | 8.1.1, 8.1.4,<br>8.1.5 |
| Arrhythmias                                       | Supraventricular rhythm                                                                 | mcr_84                                               | 8.4.1                  |
| Arrhythmias                                       | Marked sinus tachycardia                                                                | mcr_87                                               | 8.7.1                  |
| Arrhythmias                                       | Marked sinus bradycardia                                                                | mcr_88                                               | 8.8.1                  |
| QRS voltage abnormalities                         | Low voltage QRS                                                                         | mc_91                                                | 9.1.1                  |
| Atrial enlargement                                | Increased P-wave amplitude                                                              | mc_93                                                | 9.3.1                  |

AV, atrioventricular conduction.

SUPPLEMENTARY TABLE 3. ADJUSTED ODDS RATIOS OF THE ASSOCIATIONS OF THE METABOLIC SYNDROME AND ITS COMPONENTS WITH MAJOR AND MINOR ELECTROCARDIOGRAPHIC ABNORMALITIES USING ASIAN-SPECIFIC CRITERIA FOR WAIST CIRCUMFERENCE

| Risk factor        | ECG abnormality | Model 1* |           | Model 2† |           |
|--------------------|-----------------|----------|-----------|----------|-----------|
|                    |                 | OR‡      | 95% CI    | OR‡      | 95% CI    |
| Metabolic syndrome | Major           |          |           |          |           |
|                    | Male            | 1.66     | 1.32-2.09 |          |           |
|                    | Female          | 1.88     | 1.47-2.42 |          |           |
|                    | Minor           |          |           |          |           |
| Hypertension       | Male            | 1.02     | 0.87-1.21 |          |           |
|                    | Female          | 1.38     | 1.19-1.59 |          |           |
|                    | Major           |          |           |          |           |
|                    | Male            | 2.22     | 1.72-2.86 | 2.03     | 1.57-2.64 |
| High triglyceride  | Female          | 1.68     | 1.27-2.22 | 1.44     | 1.09-1.92 |
|                    | Minor           |          |           |          |           |
|                    | Male            | 1.31     | 1.12-1.54 | 1.30     | 1.11-1.53 |
|                    | Female          | 1.53     | 1.32-1.79 | 1.49     | 1.27-1.72 |
| Central obesity    | Major           |          |           |          |           |
|                    | Male            | 1.03     | 0.81-1.32 | 0.83     | 0.64-1.08 |
|                    | Female          | 1.84     | 1.41-2.39 | 1.54     | 1.17-2.02 |
|                    | Minor           |          |           |          |           |
| High FBG           | Male            | 0.85     | 0.72-1.01 | 0.78     | 0.66-0.93 |
|                    | Female          | 1.11     | 0.95-1.31 | 1.01     | 0.86-1.20 |
|                    | Major           | 1.72     | 1.43-2.06 | 1.50     | 1.23-1.81 |
|                    | Minor           | 1.23     | 1.10-1.37 | 1.17     | 1.04-1.32 |
| Low HDL-C          | Major           | 1.60     | 1.34-1.92 | 1.33     | 1.10-1.60 |
|                    | Minor           | 1.19     | 1.06-1.35 | 1.11     | 0.98-1.26 |
| Low HDL-C          | Major           | 1.26     | 1.06-1.50 | 1.06     | 0.88-1.28 |
|                    | Minor           | 1.03     | 0.93-1.15 | 1.00     | 0.89-1.13 |

‡Odds ratios were estimated using multinomial logistic regression with normal ECG as reference.

\*Model 1: Metabolic syndrome or its individual components, adjusted for age, gender and ethnicity. Metabolic syndrome, hypertension and high triglyceride are presented in subgroups of gender due to their significant interactions with gender at the 0.05% level.

†Model 2: All components of the metabolic syndrome concurrently adjusted for age, gender, ethnicity, interaction terms of "high triglyceride with gender" and "hypertension with gender".

HDL-C, high density lipoprotein-cholesterol; FBG, fasting blood glucose.
